# Supplementary material
Source: publisher figshare collection journal article supplement (https://gsapubs.figshare.com/articles/dataset/_/14319863)
Supplement: Supplementary file 1 [file 2]

## Sheet: Feuil1
Table DR2. U–Pb titanite dates from the analyzed specimens of the Swat region.
Spc.	Spot ID	Pb (ppm)	U (ppm)	Th (ppm)	207/235	1 SE abs.	206/238	1 SE abs.	6/38 - 7/35 rho	207/206 Age (Ma)	2 SE abs. (Ma)	207/235 Age (Ma)	2 SE abs. (Ma)	206/238 Age (Ma)	2 SE abs. (Ma)	207Pb corr'd 206/238 Age (Ma)	2 SE abs. (Ma)
H65	A-1	1.952	131.2	3.46	0.468172	0.00647913	0.00977	9.79501e-05	0.724434	3694	29.0877	388.7	10.7586	62.67	1.25661	38.9609	0.937185
	A-10	1.867	95.19	3.98	0.717337	0.010424	0.01253	0.00013012	0.714636	3961	30.4581	543.5	15.7957	80.3	1.66778	43.1355	1.2317
	A-11	2.22	65.42	3.07	1.18119	0.0187707	0.0164	0.000201814	0.774368	4309	29.5355	785	24.9494	104.8	2.57928	42.3596	1.72405
	A-2	2.199	114.8	5.9	0.687201	0.00979761	0.01205	0.000124067	0.722159	3958	29.562	526.3	15.0072	77.2	1.58971	41.6333	1.16309
	A-4	2.159	131.5	4.61	0.53945	0.00765641	0.01068	0.000113208	0.746846	3777	28.6243	437.8	12.4274	68.5	1.4522	40.971	1.04956
	A-6	1.479	92.32	4.27	0.499734	0.00801602	0.01005	0.000117394	0.728216	3757	33.393	412.5	13.2335	64.5	1.50685	39.014	1.11198
	A-7	1.148	126.1	3.13	0.36122	0.00568319	0.00876	0.00010352	0.751107	3463	32.1878	312.5	9.83332	56.22	1.32875	38.3689	1.00472
	A-8	1.98	107.87	3.8	0.676793	0.00980203	0.01196	0.000130656	0.754292	3945	28.5231	519	15.0334	76.7	1.67581	41.6307	1.17586
	C2-3	1.738	57.75	3.52	1.08922	0.0166221	0.01561	0.000182501	0.766113	4258	28.8847	748	22.8297	99.9	2.33592	42.3508	1.58371
	C2-4	1.771	63.73	4.92	1.04364	0.0161776	0.01513	0.000180213	0.76839	4243	29.2438	722.4	22.3961	96.8	2.30596	41.7448	1.55714
	C3-1	1.578	84.82	4.07	0.689949	0.010208	0.01188	0.000126644	0.720523	3982	30.7013	531	15.7125	76.2	1.62463	40.3148	1.18903
	C3-2	2.21	95.91	3.13	0.785832	0.0114049	0.01312	0.000140295	0.736789	4031	29.2821	588	17.0675	84	1.79645	43.1405	1.28417
	D-1	4.152	181	15.94	0.771079	0.0106917	0.01318	0.000140611	0.769402	3999	26.4868	580.6	16.1011	84.4	1.80084	44.4131	1.23322
	D-4	3.231	142.4	10.48	0.758305	0.0103818	0.01298	0.000129236	0.727245	3993	28.1054	571.6	15.6513	83.1	1.65478	43.7993	1.20085
	D-6	4.863	166.9	14.25	0.976775	0.0126701	0.01517	0.000148222	0.753255	4141	25.297	685.8	17.7915	97	1.89552	45.9286	1.31658
	D-7	1.397	61.82	5.37	0.744391	0.0120602	0.01332	0.000163951	0.759725	3936	31.6385	565.9	18.3368	85.3	2.09986	46.9287	1.46754
	D-8	1.56	128.3	9.03	0.400848	0.00573321	0.00977	0.000101337	0.725197	3458	30.5355	344.7	9.86029	62.65	1.29965	42.9117	0.999639
	E-1	2.185	220.6	6.79	0.350993	0.00496628	0.00888	9.66207e-05	0.768996	3402	28.1658	305	8.63103	56.98	1.23997	39.7857	0.939288
	E-2	1.992	152.4	3.81	0.456183	0.00665777	0.00997	0.000105907	0.727847	3631	30.6625	383	11.1794	63.94	1.35841	41.0252	1.01904
	E-3	2.33	171.2	5.82	0.476429	0.00709202	0.01031	0.000114909	0.74873	3643	30.2001	394	11.73	66.1	1.47343	42.1502	1.08496
	E-4	2.545	213.8	8.97	0.420073	0.00610382	0.00954	0.000107328	0.774265	3569	28.2901	355.9	10.3427	61.17	1.37637	40.2192	1.00828
	E-5	2.331	229.8	7.97	0.366361	0.00511019	0.00911	9.78177e-05	0.769789	3427	27.6694	315.1	8.79035	58.48	1.25585	40.4476	0.945802
	E-7	1.668	135.2	4.59	0.438609	0.00684462	0.00956	0.000107429	0.720095	3632	33.1657	373.1	11.6447	61.3	1.37769	39.2672	1.03995
	E-8	1.877	200.2	4.79	0.335505	0.00478793	0.00859	9.15182e-05	0.746562	3380	29.6071	292.6	8.35128	55.15	1.17514	38.7229	0.902901
	E-9	3.37	97.9	4.99	1.16217	0.0197128	0.01559	0.000202229	0.764746	4356	32.0148	783	26.5626	99.7	2.58656	37.946	1.77058
	F1-7	1.94	46.95	4.36	1.41572	0.0223661	0.01776	0.000215968	0.769722	4450	29.3887	897	28.3423	113.4	2.75797	37.9314	1.8915
	F2-3	1.753	189.8	4.79	0.335031	0.00478546	0.00859	8.80374e-05	0.717522	3377	31.0294	295.1	8.4302	55.16	1.13065	38.7507	0.882583
	F2-4	4.79	182.4	49.8	0.877801	0.0144029	0.01219	0.000163045	0.815168	4303	27.9171	640	21.0022	78.3	2.09457	31.4115	1.28284
	F2-5	2.443	191	5.96	0.428717	0.00597471	0.00981	9.81747e-05	0.718101	3558	29.8622	364.5	10.1595	63.02	1.26136	41.5486	0.960469
H37	A-1	89.828	165.62	15.8	0.379274	0.0052798	0.008171	7.31816e-05	0.643373	3645	32.6017	326.9	9.10142	52.46	0.939691	33.3003	0.76027
	A-2	88.378	172	15.7	0.361561	0.00558964	0.00831	7.99025e-05	0.621952	3551	37.2915	315.7	9.76128	53.35	1.02594	35.2873	0.848914
	A-3	86.977	205	10.9	0.336272	0.00437477	0.008677	7.58688e-05	0.672093	3368	30.0668	294.7	7.66787	55.69	0.97387	39.2695	0.782486
	A-5	83.767	134.91	6.5	0.693672	0.009028	0.01214	0.000106372	0.673245	3959	28.8412	541.3	14.0898	77.79	1.36321	41.8668	1.0675
	B-1	59.168	205.4	52.6	0.534046	0.00700232	0.0111	0.00010562	0.725704	3704	27.494	436.8	11.4545	71.16	1.35422	44.1455	1.00788
	B-11	56.9727	201.5	8.95	0.390116	0.00544838	0.00929	8.87671e-05	0.684168	3494	31.5002	332.6	9.29021	59.63	1.13954	40.2772	0.896834
	B-13	56.8171	217.4	22	0.362793	0.00482782	0.009358	8.36432e-05	0.671669	3368	30.7696	313.7	8.34904	60.05	1.07347	42.3434	0.862489
	B-14	56.7566	220.3	8.94	0.311264	0.00408048	0.008617	7.6269e-05	0.675166	3265	30.4391	276.2	7.24161	55.31	0.979097	40.3301	0.794045
	B-15	56.3437	113	12.18	1.26861	0.0175283	0.01748	0.000181141	0.750004	4318	26.8282	831.6	22.9804	111.7	2.31505	44.6177	1.62766
	B-2	59.078	130.3	4.77	0.791377	0.0104965	0.01324	0.000127517	0.726134	4035	27.2184	595.2	15.789	84.79	1.63325	43.633	1.18554
	B-4	58.9353	212.7	9.3	0.333888	0.0046269	0.00892	8.66061e-05	0.700638	3311	30.9888	293	8.12059	57.27	1.11209	41.062	0.883536
	B-5	58.7093	222.2	14.3	0.352503	0.00461204	0.00907	8.44239e-05	0.711423	3373	28.6887	305.8	8.00199	58.23	1.08401	40.9891	0.849671
	D-1	56.6087	149.9	9.4	0.373117	0.00493133	0.00879	8.244e-05	0.709628	3510	28.7636	322.1	8.5141	56.42	1.05831	37.8742	0.816499
	D-2	56.4047	105.07	4.63	0.812765	0.0107869	0.01303	0.000123188	0.712347	4096	27.6951	604.3	16.0403	83.43	1.57752	40.9499	1.17113
	D-4	55.9999	179.6	4.94	0.338366	0.00453885	0.00899	8.39412e-05	0.696077	3324	30.1638	295.2	7.91963	57.71	1.0777	41.275	0.857542
	D-5	55.9773	146.77	13.31	0.299689	0.00426692	0.008123	7.48585e-05	0.647264	3291	34.0737	264.5	7.53181	52.15	0.96119	37.6507	0.789829
	D-6	55.9091	170.89	12.3	0.279597	0.00390089	0.007767	7.18147e-05	0.662718	3254	32.9012	249.5	6.96197	49.87	0.922209	36.4101	0.753593
	D-7	55.8506	161.6	11.45	0.255827	0.00351912	0.007728	7.15777e-05	0.673322	3118	32.3684	233.1	6.41298	49.62	0.919173	37.5419	0.757479
	D-8	55.7743	158.48	8.82	0.262978	0.00386011	0.007741	7.34552e-05	0.646467	3161	35.5226	238.8	7.01042	49.71	0.943408	37.21	0.78418
	E-10	54.3518	174	11.19	0.29895	0.00432574	0.00847	8.73809e-05	0.712971	3227	32.0285	267.1	7.72975	54.37	1.12182	40.0538	0.897002
	E-13	53.9795	166.8	10.41	0.308629	0.0046466	0.00817	9.30302e-05	0.756316	3330	30.8352	273.9	8.24747	52.44	1.19425	37.4451	0.921545
	E-15	53.8866	188.1	13.6	0.238864	0.003705	0.00749	8.21926e-05	0.70748	3057	35.0598	218	6.76275	48.09	1.05545	36.9204	0.864308
	E-2	55.362	199.1	7.31	0.3049	0.00437009	0.00871	9.2154e-05	0.738182	3210	30.5537	270.9	7.76554	55.92	1.1833	41.3361	0.937499
	E-3	54.9642	199.4	8.34	0.288598	0.00404612	0.00842	8.37432e-05	0.709403	3180	31.3079	257.1	7.20903	54.07	1.07553	40.3218	0.866368
	E-7	54.4638	111.1	1.45	0.848986	0.0117643	0.01401	0.000145054	0.747186	4051	27.4531	625.7	17.3404	89.7	1.85744	45.5041	1.30591
	E-8	54.4024	128.4	6.4	0.661688	0.00943336	0.01203	0.000123958	0.722762	3908	29.6339	519	14.7982	77.1	1.58889	42.9924	1.16429
	E-9	54.4047	173.6	11.15	0.325109	0.00503145	0.00838	8.68914e-05	0.66999	3366	35.8548	285.4	8.83382	53.78	1.11528	37.9053	0.897407
	F-2	53.6532	119.74	3.29	1.01987	0.0136168	0.01554	0.000153571	0.740162	4169	26.5767	713.6	19.0553	99.4	1.9646	45.9294	1.39466
	F-3	53.621	130	3.33	0.898168	0.0123417	0.01456	0.00014474	0.723453	4077	28.2338	643.1	17.6736	93.2	1.85299	46.3719	1.34978
	G-10	68.125	116.8	6.3	0.861139	0.0113753	0.01351	0.0001291	0.723406	4127	27.0659	634.8	16.7708	86.5	1.65317	41.3866	1.20641
	G-12	66.787	98.04	4.54	1.21341	0.0180118	0.01687	0.000196236	0.783636	4306	27.0896	804	23.8691	107.8	2.50791	43.6819	1.64398
	G-14	65.825	108.8	2.99	1.03625	0.0137391	0.01537	0.000149376	0.733023	4208	26.6356	728.3	19.3122	98.3	1.9107	43.8127	1.37681
	G-15	65.8698	201.1	11.64	0.265634	0.00374502	0.007909	7.66212e-05	0.687158	3144	32.5373	239.9	6.76443	50.79	0.984092	38.1964	0.803762
	G-16	63.6763	200.4	11.2	0.288301	0.00406164	0.008018	7.45132e-05	0.659648	3251	33.3475	258.1	7.27232	51.48	0.956832	37.6057	0.783265
	G-4	76.346	225.7	11.59	0.262416	0.00355477	0.008099	7.64977e-05	0.69726	3089	30.9909	237.3	6.42909	52	0.982314	39.6773	0.804605
	G-6	70.768	122	7.08	0.814052	0.0113312	0.0134	0.000134908	0.723287	4051	28.6468	603.1	16.7897	85.8	1.72763	43.3948	1.25924
	G-7	70.564	140.15	8.01	0.407602	0.00562846	0.00861	8.48229e-05	0.713439	3679	29.5396	346.9	9.58049	55.26	1.08881	34.6236	0.821935
	G-8	69.935	142.1	14.1	0.389956	0.00591316	0.00879	9.25803e-05	0.694586	3581	33.5333	336.5	10.2051	56.43	1.18869	36.8852	0.920661
	G-9	69.509	142.17	4.78	0.259482	0.00390016	0.006849	6.73117e-05	0.653867	3333	35.59	234.5	7.04932	44	0.864861	31.3476	0.705433
	G2-1	62.6574	156	8.1	0.545268	0.00775614	0.01067	0.000113155	0.745544	3793	28.7173	444.2	12.637	68.5	1.45288	40.5619	1.04799
	G2-2	62.304	136.2	5.37	0.697028	0.0094475	0.01239	0.000119415	0.711087	3938	28.6023	542	14.6925	79.37	1.52994	43.3721	1.13661
	G2-4	61.58	134.7	7.6	0.896342	0.0128026	0.0139	0.000144458	0.727618	4140	29.0481	651.7	18.6166	89	1.84989	41.9826	1.34091
	G2-5	61.545	184.5	13.5	0.459273	0.00678846	0.01033	0.000104414	0.683848	3582	33.1432	383.3	11.331	66.26	1.3395	43.2927	1.04631
	G2-6	61.09	166.4	7.6	0.690108	0.00990278	0.01224	0.000125109	0.712306	3940	30.2219	531.5	15.2536	78.4	1.6027	42.7564	1.18889
	G2-7	61.1129	164.3	6.27	0.552823	0.00741556	0.01109	0.000108711	0.730776	3754	27.8067	445.6	11.9545	71.1	1.39393	42.9766	1.02607
	G2-8	60.9762	202.9	6.33	0.386973	0.00539038	0.00947	8.98307e-05	0.680982	3454	31.6434	330.8	9.21583	60.76	1.15272	41.6859	0.913252
	G2-9	59.7445	161	9.2	0.529997	0.00718669	0.01036	0.000101303	0.721119	3795	28.4551	431.6	11.7049	66.42	1.29895	39.3477	0.962195

## Sheet: G48803
Soret, M., et al., 2021, How Himalayan collision stems from subduction: Geology, v. 49, https://doi.org/10.1130/G48803.1
